# Supplementary material
Source: bioRxiv or medRxiv preprint supplement (https://www.biorxiv.org/highwire/filestream/15371/field_highwire_adjunct_files/7/055921-4.pdf)
Supplement: Supplementary file [file 055921-4.pdf]

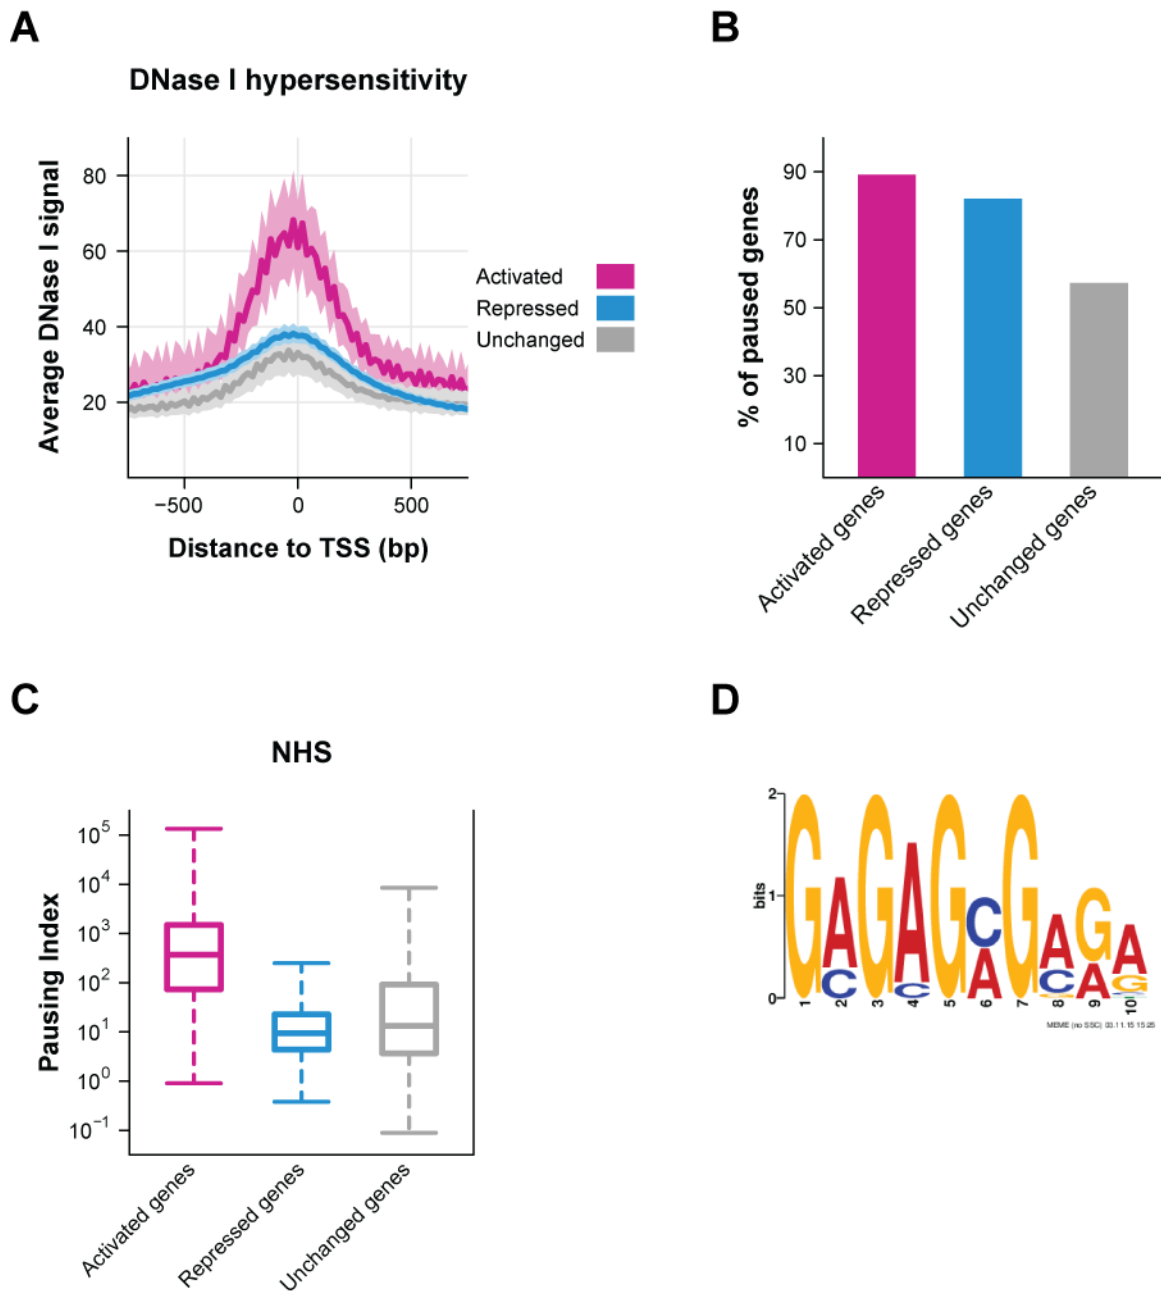

**Figure S4: Promoter region of HS activated genes is more accessible than repressed and unchanged classes prior to HS.** (A) Average DNase I hypersensitivity signal between -750 to +750 bp to the TSS (in 20 bp bins) of HS activated (n=249), repressed (n=2300), and unchanged (n=517) genes. The shaded area represents the 75% confidence interval. (B) Percentage of promoter-proximal paused genes in the HS activated, repressed, and unchanged classes. Paused genes were defined as the ones with significantly higher levels of read density in the promoter-proximal region relative to the gene-body (Fisher's exact p-value  $\leq 0.01$ ) (Core et al. 2008). (C) Box-plot showing the LacZ-RNAi NHS pausing index distribution for HS activated, repressed, and unchanged genes. (D) Sequence logo generated by MEME (Bailey and Elkan 1994) of the motif that was found enriched in the promoter region (-300 to +50 bp of the TSS) of HS activated genes.
